# Supplementary material for: Tyrosinase-Based Biosensor—A New Tool for Chlorogenic Acid Detection in Nutraceutical Formulations
Source: MDPI journal article supplement (doi:10.3390/ma15093221), 2022-04-29
Supplement: s1 [file s1]

# Tyrosinase-Based Biosensor—A New Tool for Chlorogenic Acid Detection in Nutraceutical Formulations

Irina Georgiana Munteanu and Constantin Apetrei \*

Department of Chemistry, Physics and Environment, Faculty of Sciences and Environment, Dunărea de Jos University of Galați, 47 Domneasca Street, 800008 Galați, Romania; georgiana.munteanu@ugal.ro

\* Correspondence: apetreic@ugal.ro; Tel.: +40-727-580-914

## Supplementary information

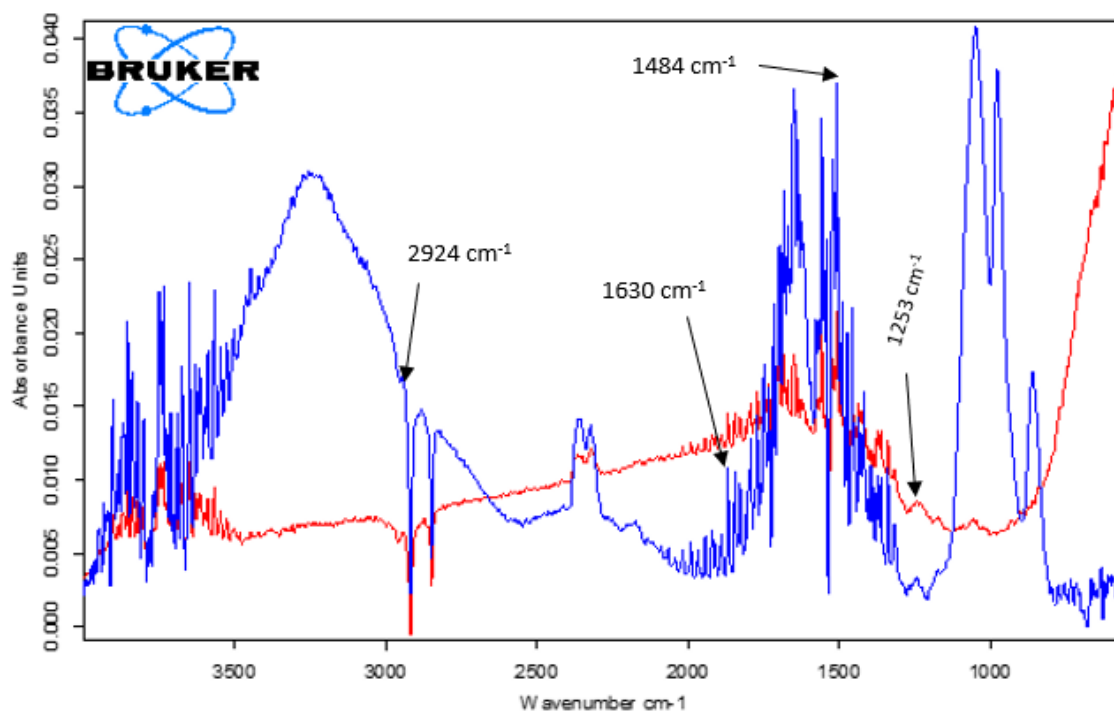

**Figure S1.** FTIR spectra for GPH-MnPc/SPE (red line) and for GPH-MnPc-Tyr/SPE (blue line).

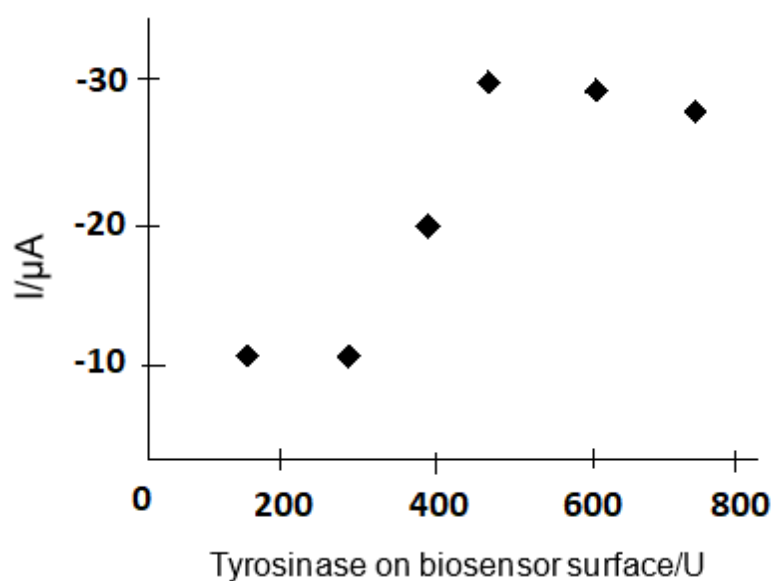

**Figure S2.** Effect of the amount of enzyme added on graphene and manganese phthalocyanine modified screen-printed carbon electrode on its sensitivity to catechol detection ( $10^{-3}$  M catechol, phosphate buffer solution  $10^{-1}$  M as supporting electrolyte, at pH=7.0). Applied potential -0.08 V vs Ag/AgCl.

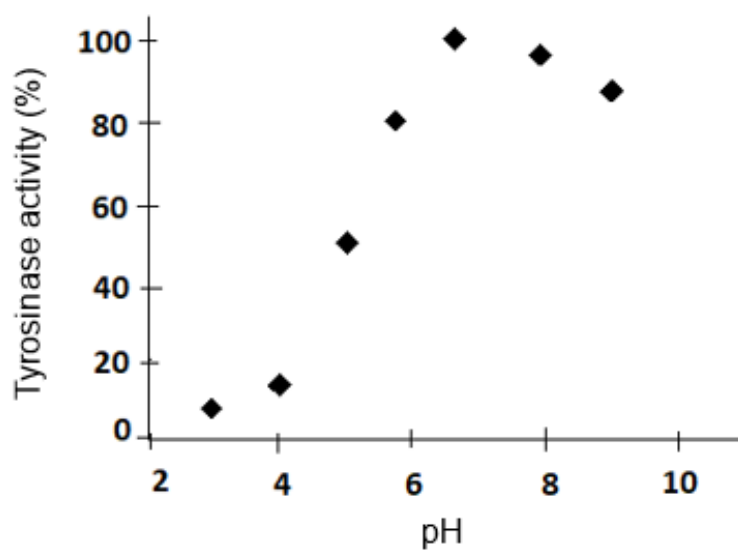

**Figure S3.** The effect of pH on tyrosinase activity.

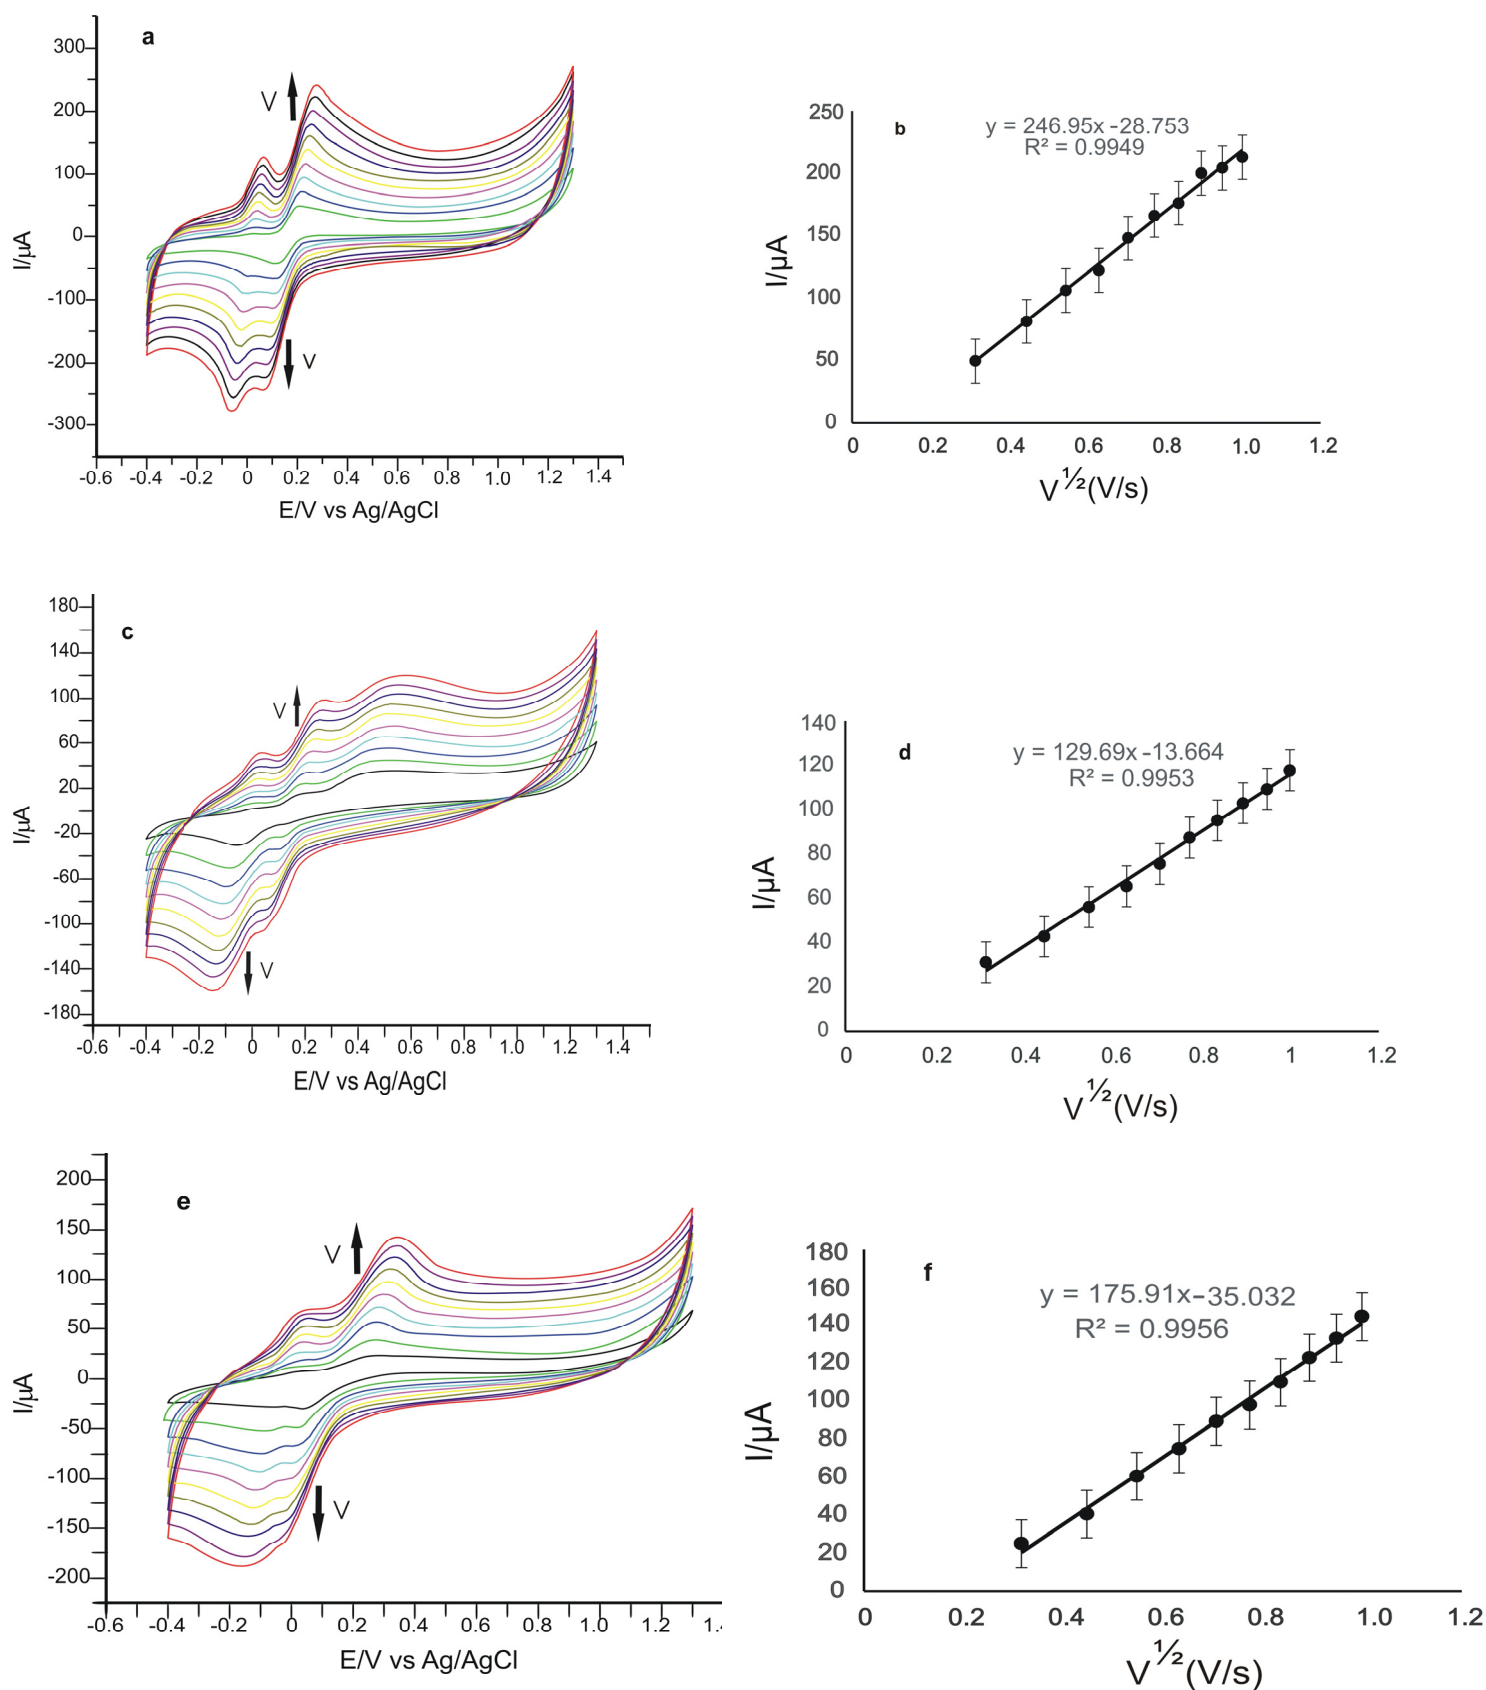

**Figure S4.** Cyclic voltammograms of the GPH/SPE (a), GPH-MnPc/SPE (c), GPH-MnPc-Tyr/SPE (e) immersed in  $10^{-3}$  M catechol –  $10^{-1}$  M PBS solution registered with scan rates between 0.1–1.0  $V \times s^{-1}$ . Plot of  $I_{pa}$  vs  $v^{1/2}$  in the case of GPH/SPE (b), GPH-MnPc/SPE (d), GPH-MnPc-Tyr/SPE (f).

**Table S1.** The values of the parameters obtained from the cyclic voltammograms of all the electrodes immersed in  $10^{-3}$  M catechol –  $10^{-1}$  M PBS double solution. <sup>1</sup> Current of the anodic peak; <sup>2</sup> Current of the cathodic peak; <sup>3</sup> Potential of the anodic peak; <sup>4</sup> Potential of the cathodic peak; <sup>5</sup> Half-wave potential; <sup>6</sup>  $\Delta E = E_{pa} - E_{pc}$ .

| Sensor           | $I_{pa}^1$ ( $\mu A$ ) | $I_{pc}^2$ ( $\mu A$ ) | $I_{pc}/I_{pa}$ | $E_{pa}^3$ (V) | $E_{pc}^4$ (V) | $E_{1/2}^5$ (V) | $\Delta E^6$ (V) |
|------------------|------------------------|------------------------|-----------------|----------------|----------------|-----------------|------------------|
| GPH-SPE          | 49.50                  | -42.55                 | 0.85            | 0.204          | 0.117          | 0.160           | 0.087            |
| GPH-MnPc/SPE     | 32.02                  | -30.69                 | 0.95            | 0.447          | -0.055         | 0.251           | 0.392            |
| GPH-MnPc-Tyr/SPE | 25.57                  | -32.65                 | 1.27            | 0.231          | -0.077         | 0.154           | 0.154            |
